# Supplementary material for: Activation of temperature-sensitive TRPV1-like receptors in ARC POMC neurons reduces food intake
Source: PubMed Central journal article supplement (PMC5915833; doi:10.1371/journal.pbio.2004399), 2018-04-24

**A**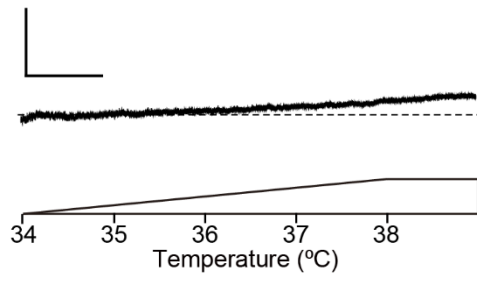**B**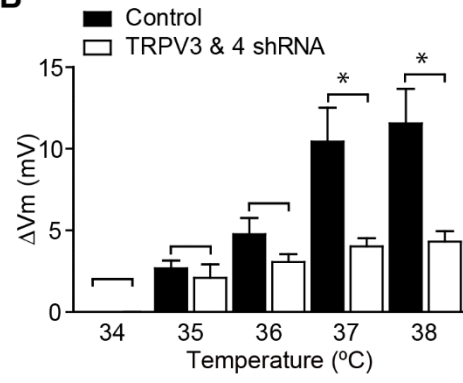

Supplement: pbio.2004399.s009.pdf [file pbio.2004399.s009.pdf]
